# Supplementary material for: Additional effects of psychological interventions on subjective and objective outcomes compared with exercise-based cardiac rehabilitation alone in patients with cardiovascular disease: A systematic review and meta-analysis
Source: PubMed Central journal article supplement — Eur J Prev Cardiol. 2019 Mar 11;26(10):1035–49. doi: 10.1177/2047487319832393 (PMC6604240; doi:10.1177/2047487319832393), 2019-03-11
Supplement: Supplemental_Material.pdf [file Supplemental_Material.pdf]

Version 2

**P**

|                                                                                                                                                                                                                                                                                                                                                                                              |
|----------------------------------------------------------------------------------------------------------------------------------------------------------------------------------------------------------------------------------------------------------------------------------------------------------------------------------------------------------------------------------------------|
| <p><b>"Coronary Artery Disease"[Mesh:NoExp] OR</b></p> <p><b>"Coronary Disease"[Mesh:NoExp] OR</b><br/>coronary artery disease*[tiab] OR<br/>coronary heart disease*[tiab] OR<br/>coronary arterioscleros*[tiab] OR<br/>coronary atheroscleros*[tiab] OR</p>                                                                                                                                 |
| <p><b>"Myocardial Ischemia"[Mesh:NoExp] OR</b><br/>ischemic heart*[tiab] OR<br/>ischaemic heart*[tiab] OR<br/>heart ischem*[tiab] OR<br/>heart ischaem*[tiab] OR<br/>myocardial ischem*[tiab] OR<br/>myocardial ischaem*[tiab] OR<br/>ischemic myocard*[tiab] OR<br/>ischaemic myocard*[tiab] OR</p>                                                                                         |
| <p><b>"Acute Coronary Syndrome"[Mesh:NoExp] OR</b><br/>acute coronary syndrome*[tiab] OR<br/>coronary acute syndrome*[tiab] OR<br/>"acute occlusive coronary"[tiab] OR<br/>acute occlusive arter*[tiab] OR<br/>coronary thromb*[tiab] OR<br/>coronary disease*[tiab] OR<br/>coronary event*[tiab] OR<br/>coronary accident*[tiab] OR<br/>coronary failure*[tiab] OR</p>                      |
| <p><b>"Angina, Unstable"[Mesh:NoExp] OR</b><br/>unstable angina*[tiab] OR<br/>preinfarction angina*[tiab] OR<br/>"angina at rest"[tiab] OR<br/>myocardial preinfarction syndrome*[tiab] OR</p>                                                                                                                                                                                               |
| <p><b>"Angina Pectoris"[Mesh:NoExp] OR</b><br/>stenocardia*[tiab] OR<br/>"angor pectoris"[tiab] OR<br/>"angina pectoris"[tiab] OR</p>                                                                                                                                                                                                                                                        |
| <p><b>"Myocardial Infarction"[Mesh:NoExp] OR</b><br/><b>"Inferior Wall Myocardial Infarction"[Mesh:NoExp] OR</b><br/><b>"Anterior Wall Myocardial Infarction"[Mesh:NoExp] OR</b><br/>myocardial infarct*[tiab] OR<br/>heart attack*[tiab] OR<br/>ST elevat*[tiab] OR<br/>non-ST-elevat*[tiab] OR<br/>stemi*[tiab] OR<br/>nstemi*[tiab] OR<br/>nonstemi*[tiab] OR<br/>non stemi*[tiab] OR</p> |
| <p><b>"Myocardial Stunning"[Mesh:NoExp] OR</b></p>                                                                                                                                                                                                                                                                                                                                           |

|                                                                                                                                                                                                                                                                                                                                                                                                                                                                  |
|------------------------------------------------------------------------------------------------------------------------------------------------------------------------------------------------------------------------------------------------------------------------------------------------------------------------------------------------------------------------------------------------------------------------------------------------------------------|
| <p>"Myocardial Hibernation"[tiab] OR<br/> "Stunned Myocardium"[tiab] OR<br/> "stunning myocardium"[tiab] OR<br/> myocardium stunn*[tiab] OR<br/> myocardial stunn*[tiab] OR</p>                                                                                                                                                                                                                                                                                  |
| <p><b>"Heart Failure"[Mesh:NoExp] OR</b><br/> heart fail*[tiab] OR<br/> cardiac fail*[tiab] OR<br/> failing heart*[tiab] OR<br/> myocardial fail*[tiab] OR<br/> failing myocard*[tiab] OR<br/> failure myocard*[tiab] OR<br/> "Heart Decompensation"[tiab] OR<br/> decompensate heart fail*[tiab] OR<br/> decompensated heart fail*[tiab] OR<br/> Right Sided Heart Fail*[tiab] OR<br/> Congestive Heart Fail*[tiab] OR<br/> Left Sided Heart Fail*[tiab] OR</p> |
| <p><b>"Heart Failure, Diastolic"[Mesh:NoExp] OR</b><br/> Systolic Heart Fail*[tiab] OR</p>                                                                                                                                                                                                                                                                                                                                                                       |
| <p><b>"Heart Failure, Systolic"[Mesh:NoExp] OR</b><br/> "impaired myocardial function"[tiab] OR<br/> "reduced myocardial function"[tiab] OR<br/> "myocardial insufficiency"[tiab] OR<br/> Diastolic Heart Fail*[tiab] OR</p>                                                                                                                                                                                                                                     |
| <p><b>"Myocardial Revascularization"[Mesh:NoExp] OR</b><br/> Revascularization*[tiab] OR<br/> Internal Mammary Artery Implantation*[tiab] OR</p>                                                                                                                                                                                                                                                                                                                 |
| <p><b>"Coronary Artery Bypass"[Mesh:NoExp] OR</b><br/> Coronary Artery Bypass*[tiab] OR<br/> coronary bypass*[tiab] OR<br/> Aortocoronary Bypass*[tiab] OR<br/> cabg*[tiab] OR<br/> cardiac bypass*[tiab] OR<br/> acute occlusive dissection*[tiab] OR</p>                                                                                                                                                                                                       |
| <p><b>"Coronary Artery Dissection, Spontaneous" [Supplementary Concept] OR</b><br/> Coronary Artery Dissection*[tiab] OR</p>                                                                                                                                                                                                                                                                                                                                     |
| <p><b>"Percutaneous Coronary Intervention"[Mesh:NoExp] OR</b><br/> coronary intervention*[tiab] OR</p>                                                                                                                                                                                                                                                                                                                                                           |
| <p><b>"Internal Mammary-Coronary Artery Anastomosis"[Mesh:NoExp] OR</b><br/> "Coronary Internal Mammary"[tiab] OR<br/> Internal Mammary Coronary Artery Anastomos*[tiab] OR</p>                                                                                                                                                                                                                                                                                  |
| <p><b>"Angioplasty, Balloon, Coronary"[Mesh:NoExp] OR</b><br/> Coronary Balloon*[tiab] OR<br/> Coronary Angioplast*[tiab] OR<br/> coronary stent*[tiab] OR</p>                                                                                                                                                                                                                                                                                                   |

**"Vascular Grafting"[Mesh:NoExp] OR**

vessel graft\*[tiab] OR  
vascular graft\*[tiab] OR

**"Heart-Assist Devices"[Mesh:NoExp] OR**

Ventricular Assist Device\*[tiab] OR  
Ventricular Assisted\*[tiab] OR  
Heart Assist Pump\*[tiab] OR  
Vascular Assist Device\*[tiab] OR  
Artificial Ventricle\*[tiab] OR  
Ventricle Assist Device\*[tiab] OR  
Artificial Heart Ventricle\*[tiab] OR

**"Defibrillators, Implantable"[Mesh:NoExp] OR**

implanted cardioverter defibrillat\*[tiab] OR  
implantable cardioverter defibrillat\*[tiab] OR  
implantable defibrillat\*[tiab]

I

**"Social Support"[Mesh:NoExp] OR**

social network\*[tiab] OR  
psychosocial support\*[tiab] OR  
psychosocial intervention\*[tiab] OR  
social support\*[tiab] OR

**"Psychotherapy"[Mesh:NoExp] OR**

psychotherap\*[tiab] OR  
psychologic treatment\*[tiab] OR  
psychologic intervention\*[tiab] OR  
psychologic therap\*[tiab] OR  
psychological treatment\*[tiab] OR  
psychological intervention\*[tiab] OR  
psychological therap\*[tiab] OR

**"Stress, psychological"[Mesh:NoExp] OR**

"stress management"[tiab] OR  
"distress management"[tiab] OR

**"Relaxation Therapy"[Mesh:NoExp] OR**

relaxation Technique\*[tiab] OR  
relaxation Technic\*[tiab] OR  
relaxation therap\*[tiab] OR  
progressive muscle relaxation\*[tiab] OR

**"Cognitive Therapy"[Mesh:NoExp] OR**

Cognitive Therap\*[tiab] OR  
Cognition Therap\*[tiab] OR

**"Autogenic Training"[Mesh:NoExp] OR**

Autogenic Training\*[tiab] OR

**"Meditation"[Mesh:NoExp] OR**

meditation\*[tiab] OR

**"Negotiating"[Mesh:NoExp] OR**

Mediation\*[tiab] OR

|                                                                                                                                                                                                                                                                                                                                                                                                                                                                                                                                                                                                                                                                                                                                                                                                                                                                                                                            |
|----------------------------------------------------------------------------------------------------------------------------------------------------------------------------------------------------------------------------------------------------------------------------------------------------------------------------------------------------------------------------------------------------------------------------------------------------------------------------------------------------------------------------------------------------------------------------------------------------------------------------------------------------------------------------------------------------------------------------------------------------------------------------------------------------------------------------------------------------------------------------------------------------------------------------|
| Mediating[tiab] OR                                                                                                                                                                                                                                                                                                                                                                                                                                                                                                                                                                                                                                                                                                                                                                                                                                                                                                         |
| <b>"Adaptation, Psychological"[Mesh:NoExp] OR</b><br>Psychological Adjustment*[tiab] OR<br>Psychological Adaptation*[tiab] OR<br>Psychologic Adaptation*[tiab] OR<br>coping*[tiab] OR                                                                                                                                                                                                                                                                                                                                                                                                                                                                                                                                                                                                                                                                                                                                      |
| <b>"Life Change Events"[Mesh:NoExp] OR</b><br>life style chang*[tiab] OR<br>lifestyle chang*[tiab] OR<br>Life Change Event*[tiab] OR<br>Event History Analys*[tiab] OR                                                                                                                                                                                                                                                                                                                                                                                                                                                                                                                                                                                                                                                                                                                                                     |
| <b>"Muscle Relaxation"[Mesh:NoExp] OR</b><br>Muscle Relaxation*[tiab] OR                                                                                                                                                                                                                                                                                                                                                                                                                                                                                                                                                                                                                                                                                                                                                                                                                                                   |
| <b>"Motivation"[Mesh:NoExp] OR</b><br>disincentive*[tiab] OR<br>incentive*[tiab] OR<br>motivational interview*[tiab] OR                                                                                                                                                                                                                                                                                                                                                                                                                                                                                                                                                                                                                                                                                                                                                                                                    |
| <b>"Counseling"[Mesh:NoExp] OR</b><br>counseling*[tiab] OR                                                                                                                                                                                                                                                                                                                                                                                                                                                                                                                                                                                                                                                                                                                                                                                                                                                                 |
| <b>"Behavior Therapy"[Mesh:NoExp] OR</b><br>Conditioning Therap*[tiab] OR<br>Behavior Modification*[tiab] OR<br>Behavior Therap*[tiab] OR<br>Behavioral Therap*[tiab] OR<br>Behaviour Modification*[tiab] OR<br>Behaviour Therap*[tiab] OR<br>Behavioural Therap*[tiab] OR<br>"conversational therapy"[tiab] OR<br>"conversation therapy"[tiab] OR<br>Behavioral intervention*[tiab] OR<br>Behavioural intervention*[tiab] OR<br><br><b>"Psychopharmacology"[Mesh:NoExp] OR</b><br>Psychopharmacolog*[tiab] OR<br><br><b>"Patient Compliance"[Mesh:NoExp] OR</b><br>Patient Cooperation*[tiab] OR<br>Non Compliance*[tiab] OR<br>Noncompliance*[tiab] OR<br>Compliance*[tiab] OR<br>Compliant*[tiab] OR<br>Non Compliant*[tiab] OR<br><br><b>"Mind-Body Therapies"[Mesh:NoExp] OR</b><br>Mind Body Therap*[tiab] OR<br>Mind Body Medicine*[tiab] OR<br><br><b>"Mental Healing"[Mesh:NoExp] OR</b><br>mental heal*[tiab] OR |

**"Laughter Therapy"[Mesh:NoExp] OR**

"Laughter Therapy"[tiab] OR

**"Hypnosis"[Mesh:NoExp] OR**

Hypnos\*[tiab] OR

Mesmerism\*[tiab] OR

**"Biofeedback, Psychology"[Mesh:NoExp] OR**

"Psychological Feedback"[tiab] OR

Biofeedback\*[tiab] OR

Myofeedback\*[tiab] OR

False Physiological Feedback\*[tiab] OR

Bogus Physiological Feedback\*[tiab] OR

**"Self Care"[Mesh:NoExp] OR**

self care\*[tiab] OR

self manage\*[tiab]

## C

**"Physical Fitness"[Mesh:NoExp] OR**

"Physical Fitness"[tiab] OR

**"Sports"[Mesh:NoExp] OR**

sport\*[tiab] OR

athletic\*[tiab] OR

**"Resistance Training"[Mesh:NoExp] OR**

resistance training\*[tiab] OR

strength training\*[tiab] OR

**"Walking"[Mesh:NoExp] OR**

walking[tiab] OR

**"Running"[Mesh:NoExp] OR**

running\*[tiab] OR

**"Jogging"[Mesh:NoExp] OR**

jogging[tiab] OR

**"Swimming"[Mesh:NoExp] OR**

swimming[tiab] OR

**"Gymnastics"[Mesh:NoExp] OR**

gymnastic\*[tiab] OR

calisthenic\*[tiab] OR

**"Bicycling"[Mesh:NoExp] OR**

"bicycle training"[tiab] OR

**"Physical Endurance"[Mesh:NoExp] OR**

"endurance training"[tiab] OR

Physical Enduranc\*[tiab] OR

**"Physical Fitness"[Mesh:NoExp] OR**

physical activit\*[tiab] OR

physical exercise\*[tiab] OR

"exercise based"[tiab] OR

**"Tai Ji"[Mesh:NoExp] OR**

"Tai Chi"[tiab] OR

"Tai Ji Quan"[tiab] OR

Taiji[tiab] OR

Taijiquan[tiab] OR

"T'ai Chi"[tiab] OR

**"Exercise Movement Techniques"[Mesh:NoExp] OR**

Exercise Movement\*[tiab] OR

Pilates[tiab] OR

**"Exercise Therapy"[Mesh:NoExp] OR**

exercise therap\*[tiab] OR

exercise training\*[tiab] OR

"dynamic training"[tiab] OR

dynamic exercise\*[tiab] OR

"strength training"[tiab] OR

**"Secondary Prevention"[Mesh:NoExp] OR**

Secondary Prevention\*[tiab] OR

Relapse Prevention\*[tiab] OR

**"Rehabilitation"[Mesh:NoExp] OR**

rehabilitation\*[tiab] OR

**"Diabetes Mellitus/prevention and control"[Mesh:NoExp] OR**

**"Hypercholesterolemia/prevention and control"[Mesh:NoExp] OR**

**"Physical Therapy Modalities"[Mesh:NoExp] OR**

physical therap\*[tiab] OR

physiotherap\*[tiab] OR

**"Occupational Therapy"[Mesh:NoExp] OR**

Occupational Therap\*[tiab] OR

**trauma intervention\*[tiab] OR**

trauma therap\*[tiab] OR

**"Yoga"[Mesh:NoExp] OR**

yoga[tiab] OR

**"Breathing Exercises"[Mesh:NoExp] OR**

"Respiratory Muscle Training"[tiab] OR

breathing exercise\*[tiab] OR

**"Dance Therapy"[Mesh:NoExp] OR**

dance\*[tiab] OR

**"Tobacco Use Cessation"[Mesh:NoExp] OR**

**"Smoking Cessation"[Mesh:NoExp] OR**

tobacco\*[tiab] OR

smok\*[tiab] OR

**"Diet Therapy"[Mesh:NoExp] OR**

|                                                                                                                                        |
|----------------------------------------------------------------------------------------------------------------------------------------|
| diet therap*[tiab] OR<br>eating habit*[tiab] OR                                                                                        |
| <b>"Diet, Mediterranean"[Mesh:NoExp] OR</b><br>mediterranean*[tiab] OR                                                                 |
| <b>"Diet, Fat-Restricted"[Mesh:NoExp] OR</b><br>"Fat Restricted"[tiab] OR<br>"Low Fat"[tiab] OR<br>"Fat Free"[tiab] OR                 |
| <b>"Diet, Protein-Restricted"[Mesh:NoExp] OR</b><br>"Protein Restricted"[tiab] OR<br>"Low Protein"[tiab] OR<br>"Protein Free"[tiab] OR |
| <b>"Diet, Vegetarian"[Mesh:NoExp] OR</b><br>Vegetarian*[tiab] OR<br>Vegan*[tiab] OR                                                    |
| <b>"Fatty Acids, Omega-3"[Mesh:NoExp] OR</b><br>"Omega 3"[tiab] OR<br>PUFA[tiab] OR<br>"Fatty Acids"[tiab] OR                          |
| <b>"Weight Reduction Programs"[Mesh:NoExp] OR</b><br>"weight loss"[tiab] OR<br>"body weight"[tiab] OR                                  |
| <b>"health education"[Mesh:NoExp] OR</b><br>health education*[tiab] OR<br>health coaching*[tiab] OR                                    |
| <b>"Patient Education as Topic"[Mesh:NoExp] OR</b><br>patient education*[tiab] OR<br>education of patient*[tiab]                       |

**e-table 1:** Search strategy.

| <b>Study</b>               | <b>Reason for Exclusion</b>                                                                                                                                                                    |
|----------------------------|------------------------------------------------------------------------------------------------------------------------------------------------------------------------------------------------|
| <b>Data on depression</b>  |                                                                                                                                                                                                |
| Andersson et al. 2010      | values reported at baseline only                                                                                                                                                               |
| Blumenthal et al. 2016     | Follow up for the assessment of depression to short (3 months)                                                                                                                                 |
| Black et al. 1998          | results given as change scores from baseline to f/u only                                                                                                                                       |
| Rugulies et al. 1996       | mean values (final and change scores) given only, but no standard deviations                                                                                                                   |
| Peersen et al. 2017        | no data were provided; Only mentioned that no differences were found                                                                                                                           |
| <b>Data on anxiety</b>     |                                                                                                                                                                                                |
| Blumenthal et al. 2016     | Follow up for the assessment of anxiety to short (3 months)                                                                                                                                    |
| Vahedian-Azimi et al. 2016 | high risk of bias: Extreme changes in anxiety: the subscale "state anxiety" remains constant for the intervention, while in the control group an extreme impairment is observed after baseline |
| <b>Data on QoL</b>         |                                                                                                                                                                                                |
| Andersson et al. 2010      | only baseline values reported                                                                                                                                                                  |
| Peersen et al. 2017        | extreme wide range of the follow-up assessment (2 to 26 months)                                                                                                                                |

**e-Table 2:** Reasons for study data excluded from the meta-analyses, separately for outcome.



| Study                      | Endpoint        |                       |                     | Measurement                      |                    | Follow-up | Subgroup |
|----------------------------|-----------------|-----------------------|---------------------|----------------------------------|--------------------|-----------|----------|
|                            | Hospitalisation | Cardiovascular events | Reported separately | Patients with at least one event | No of total events |           |          |
| Blumenthal et al. 2016     | x               | x                     | x                   | x                                |                    | 5 years   | DM       |
| Plüss et al. 2011          | o               | x                     | x                   | x                                | o                  | 5 years   | DM       |
| Andersson et al. 2010      | x               |                       |                     |                                  | x                  | 5 years   | DM       |
| Neves et al. 2009          | x               |                       |                     | x                                |                    | 2 years   | DM       |
| van Dixhoorn et al. 1999   | x               | x                     |                     | x                                | x                  | 5 years   | DM       |
| Sebregts et al. 2005       |                 | x                     |                     | x                                |                    | 9 months  | psyLCDM  |
| Black et al. 1998          | x               |                       |                     | x                                | x                  | 1 year    | psyLCDM  |
| Vahedian-Azimi et al. 2016 |                 | x                     |                     | x                                |                    | 2 years   | psyLCDM  |

**Abbreviations:** DM = distress management; psyLCDM: psychologically supported lifestyle change and distress management

**e-Table 3:** Summary of measurements on morbidity.

*Note:* Plüss et al. 2011 measured “hospitalization” as the number of total events (labeled “o”) and CV-events as patients with at least one event (labeled “x”). Andersson et al. 2010 measured “hospitalization” as “emergency visits”.

|                            | Random sequence generation (selection bias) | Allocation concealment (selection bias) | Blinding of participants and personnel (performance bias) | Blinding of outcome assessment (detection bias) | Incomplete outcome data (attrition bias) | Selective reporting (reporting bias) | Other bias | Groups balanced at baseline | Intention-to-treat analysis conducted | Groups received same treatment (apart from the intervention) |
|----------------------------|---------------------------------------------|-----------------------------------------|-----------------------------------------------------------|-------------------------------------------------|------------------------------------------|--------------------------------------|------------|-----------------------------|---------------------------------------|--------------------------------------------------------------|
| Andersson 2010             | ?                                           | +                                       | -                                                         | -                                               | ?                                        | ?                                    | ?          | +                           | ?                                     | -                                                            |
| Barth 2006                 | +                                           | +                                       | -                                                         | -                                               | -                                        | +                                    | -          | +                           | -                                     | ?                                                            |
| Beckie 2011                | +                                           | +                                       | -                                                         | +                                               | +                                        | ?                                    | ?          | +                           | -                                     | ?                                                            |
| Black 1998                 | -                                           | -                                       | -                                                         | ?                                               | ?                                        | ?                                    | -          | +                           | +                                     | ?                                                            |
| Blumenthal 2016            | ?                                           | ?                                       | -                                                         | +                                               | +                                        | ?                                    | ?          | +                           | +                                     | ?                                                            |
| Brügemann 2007             | +                                           | ?                                       | -                                                         | ?                                               | -                                        | ?                                    | -          | +                           | -                                     | ?                                                            |
| Chair 2013                 | +                                           | +                                       | -                                                         | +                                               | -                                        | ?                                    | ?          | -                           | -                                     | ?                                                            |
| Focht 2004                 | ?                                           | ?                                       | -                                                         | ?                                               | -                                        | ?                                    | ?          | -                           | -                                     | ?                                                            |
| Karlsson 2007              | +                                           | +                                       | -                                                         | ?                                               | +                                        | ?                                    | ?          | +                           | ?                                     | ?                                                            |
| Meng et al. 2016           | +                                           | +                                       | -                                                         | ?                                               | +                                        | ?                                    | ?          | +                           | ?                                     | ?                                                            |
| Neves 2009                 | ?                                           | ?                                       | -                                                         | ?                                               | +                                        | ?                                    | -          | +                           | ?                                     | ?                                                            |
| O'Rourke 1999              | -                                           | -                                       | -                                                         | -                                               | -                                        | -                                    | -          | -                           | -                                     | -                                                            |
| Peersen et al. 2017        | -                                           | -                                       | -                                                         | -                                               | -                                        | -                                    | -          | -                           | -                                     | -                                                            |
| Pfaeffli Dale et al. 2015  | +                                           | +                                       | -                                                         | ?                                               | +                                        | +                                    | ?          | +                           | +                                     | +                                                            |
| Plüss 2011                 | +                                           | +                                       | -                                                         | +                                               | +                                        | ?                                    | ?          | +                           | ?                                     | ?                                                            |
| Raghuram 2014              | +                                           | ?                                       | -                                                         | -                                               | -                                        | ?                                    | -          | +                           | ?                                     | ?                                                            |
| Rugulies 1996              | -                                           | -                                       | -                                                         | -                                               | -                                        | -                                    | -          | -                           | -                                     | -                                                            |
| Scholz 2006                | -                                           | -                                       | -                                                         | ?                                               | ?                                        | ?                                    | -          | +                           | ?                                     | ?                                                            |
| Sebgrets 2005              | +                                           | +                                       | -                                                         | -                                               | -                                        | ?                                    | ?          | -                           | +                                     | ?                                                            |
| Vahedian-Azimi et al. 2016 | +                                           | +                                       | -                                                         | +                                               | ?                                        | ?                                    | -          | +                           | +                                     | +                                                            |
| van Dixhoorn 1999          | ?                                           | ?                                       | -                                                         | ?                                               | +                                        | ?                                    | ?          | +                           | ?                                     | ?                                                            |

e-Tab 4: Risk of bias summary.
